# Supplementary material
Source: HighWire-hosted journal article supplement (https://gh.bmj.com/content/7/10/e009378)
Supplement: inline-supplementary-material-1 [file inline-supplementary-material-1.pdf]

## Supplemental files

### Contents

|                             |   |
|-----------------------------|---|
| Supplemental table 1 .....  | 2 |
| Supplemental figure 1 ..... | 3 |
| Supplemental figure 2 ..... | 4 |
| Supplemental figure 3 ..... | 5 |
| Supplemental figure 4 ..... | 6 |
| Supplemental figure 5 ..... | 7 |
| Supplemental figure 6 ..... | 8 |

**Supplemental table 1** Search strategy

| <b>Databases</b> |    | <b>Retrieval strategy</b>                                                                                                                                                                                |
|------------------|----|----------------------------------------------------------------------------------------------------------------------------------------------------------------------------------------------------------|
| PubMed           | #1 | "living systematic review*" [Title/Abstract]                                                                                                                                                             |
|                  | #2 | "living meta analysis" [Title/Abstract] OR "living meta-analysis" [Title/Abstract] OR "living meta analyses" [Title/Abstract] OR "living meta-analyses" [Title/Abstract]                                 |
|                  | #3 | "living network meta analysis" [Title/Abstract] OR "living network meta-analysis" [Title/Abstract] OR "living network meta analyses" [Title/Abstract] OR "living network meta-analyses" [Title/Abstract] |
|                  | #4 | #1 OR #2 OR #3                                                                                                                                                                                           |
| Cochrane Library | #1 | "living systematic review*":ti,ab,kw                                                                                                                                                                     |
|                  | #2 | ("living meta analysis" OR "living meta-analysis" OR "living meta analyses" OR "living meta-analyses"):ti,ab,kw                                                                                          |
|                  | #3 | ("living network meta analysis" OR "living network meta-analysis" OR "living network meta analyses" OR "living network meta-analyses"):ti,ab,kw                                                          |
|                  | #4 | #1 OR #2 OR #3                                                                                                                                                                                           |
| Embase           | #1 | 'living systematic review*':ti,ab,kw                                                                                                                                                                     |
|                  | #2 | 'living meta analysis':ti,ab,kw OR 'living meta-analysis':ti,ab,kw OR 'living meta analyses':ti,ab,kw OR 'living meta-analyses':ti,ab,kw                                                                 |
|                  | #3 | 'living network meta analysis':ti,ab,kw OR 'living network meta-analysis':ti,ab,kw OR 'living network meta analyses':ti,ab,kw OR 'living network meta-analyses':ti,ab,kw                                 |
|                  | #4 | #1 OR #2 OR #3                                                                                                                                                                                           |
| Web of Science   | #1 | TS=("living systematic review*")                                                                                                                                                                         |
|                  | #2 | TS=("living meta analysis" OR "living meta-analysis" OR "living meta analyses" OR "living meta-analyses")                                                                                                |
|                  | #3 | TS=("living network meta analysis" OR "living network meta-analysis" OR "living network meta analyses" OR "living network meta-analyses")                                                                |
|                  | #4 | #1 OR #2 OR #3                                                                                                                                                                                           |

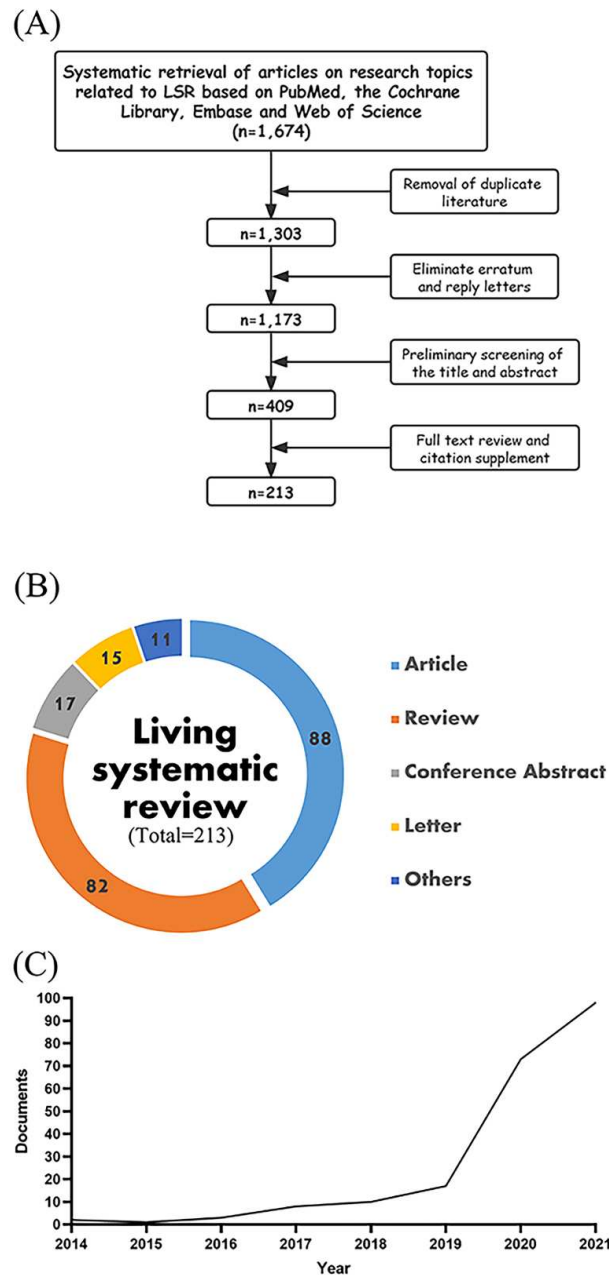

**Supplemental figure 1** Literature selection process, article types and publication trends. (A) Research literature screening process. (B) Type distribution of related research papers on living systematic review. (C) Annual publication trends of living systematic review.

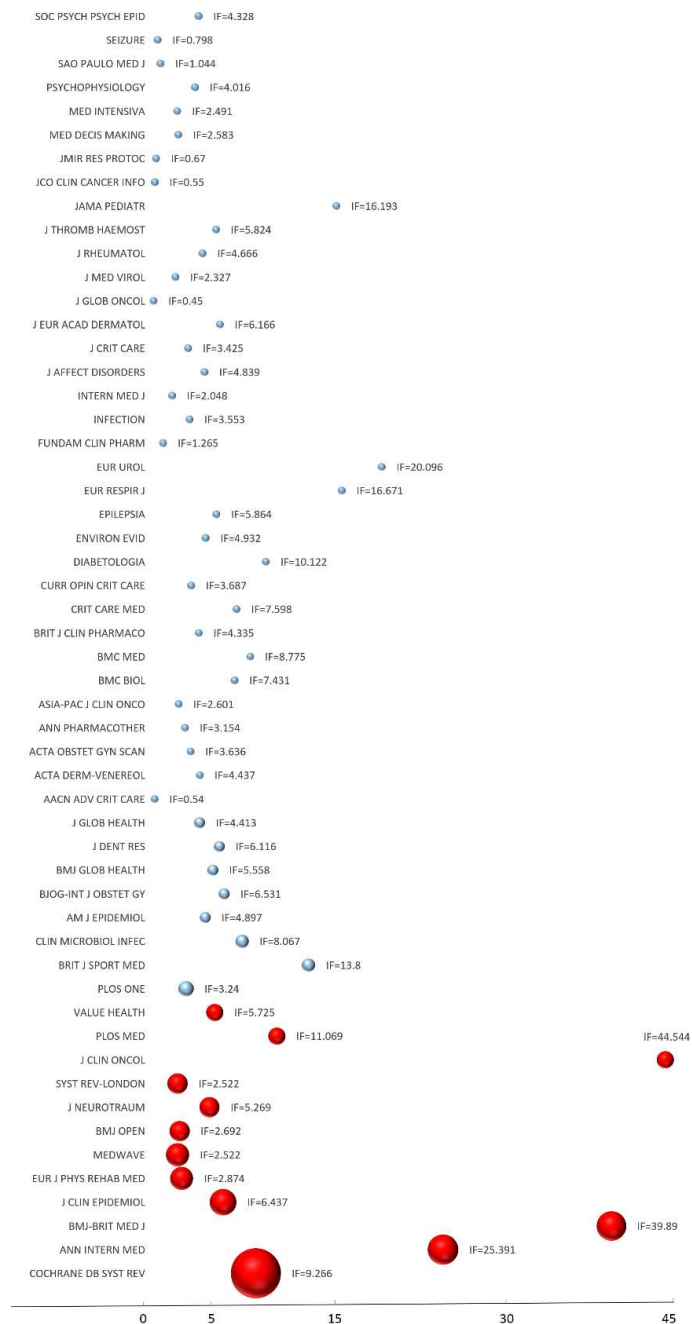

**Supplemental figure 2** Distribution of LSR-related research in journals.

IF, impact factor.

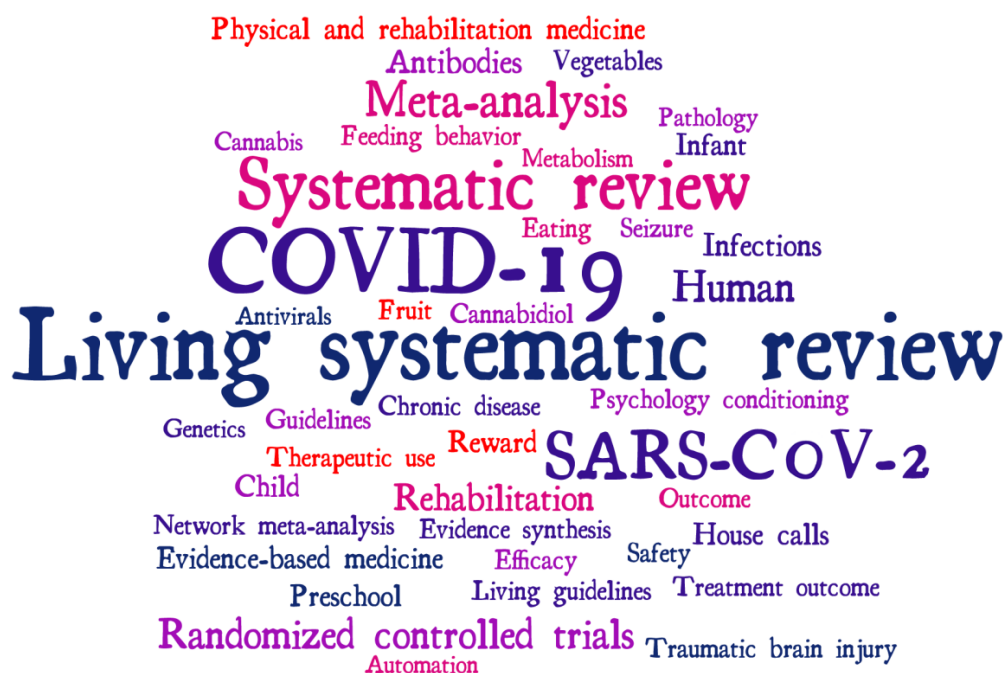

**Supplemental figure 3** Word cloud distribution map of research focus.

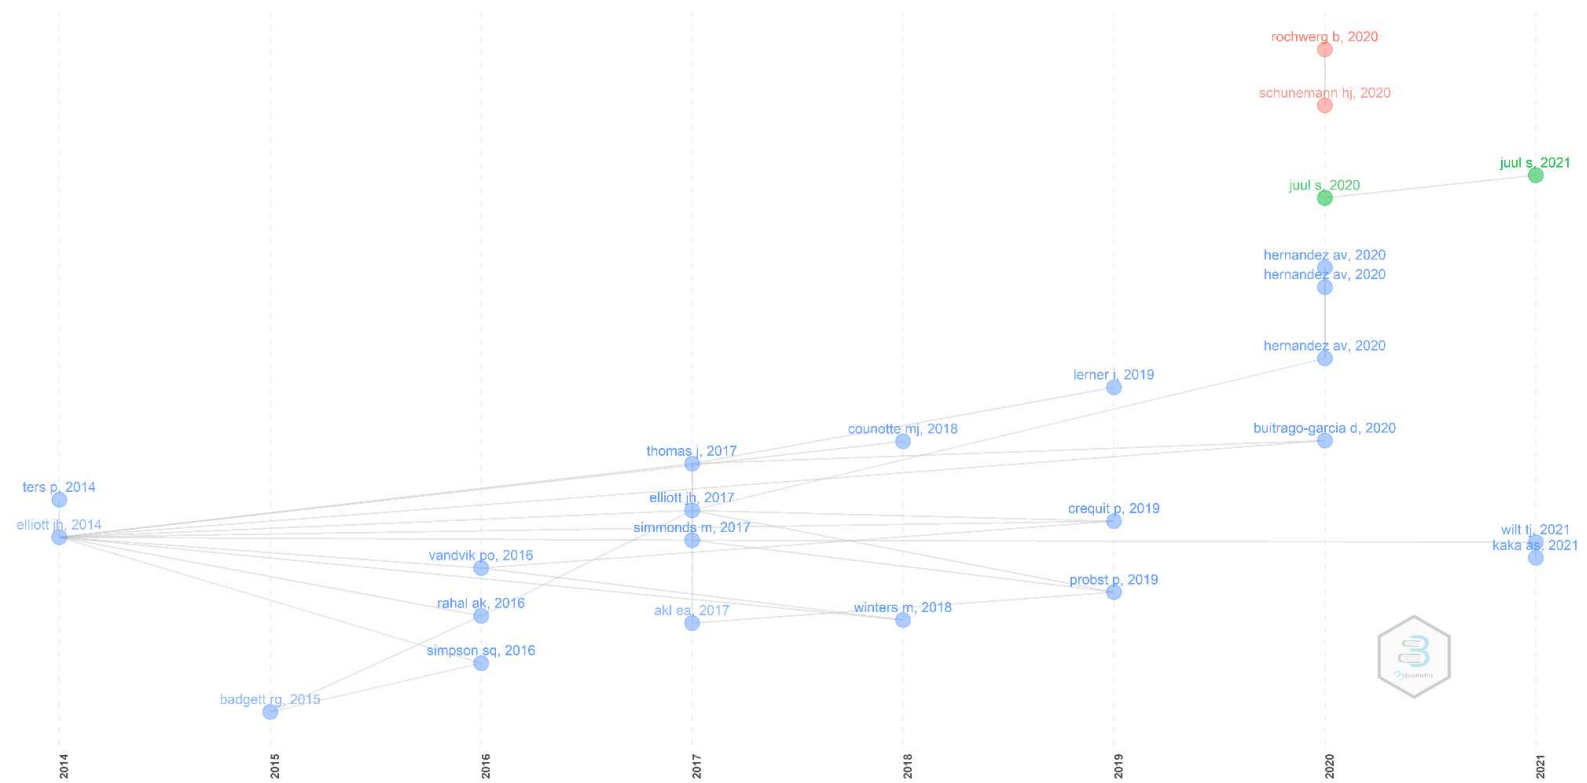

**Supplemental figure 4** LSR-related research historical direct citation network.

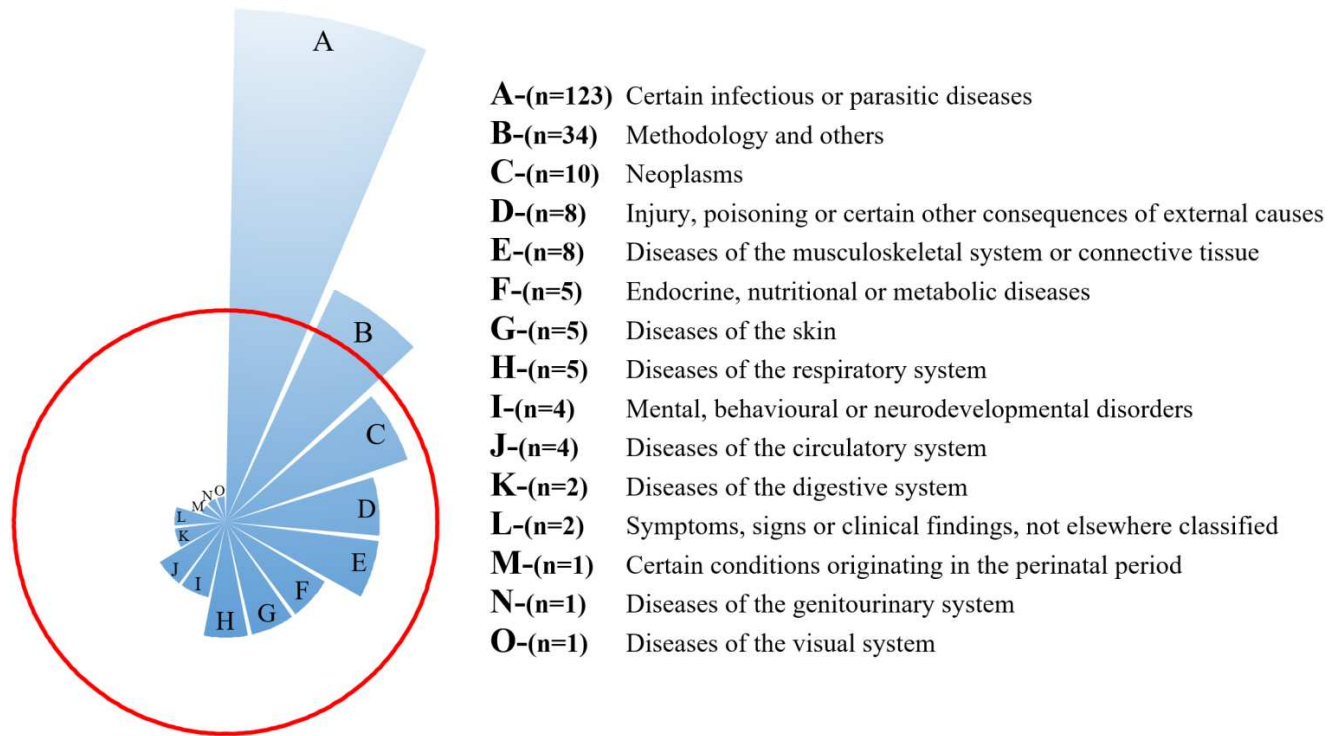

**Supplemental figure 5** Hotspot disease distribution of LSR based on ICD-11. ICD-11, the 11th edition of the International Classification of Diseases.

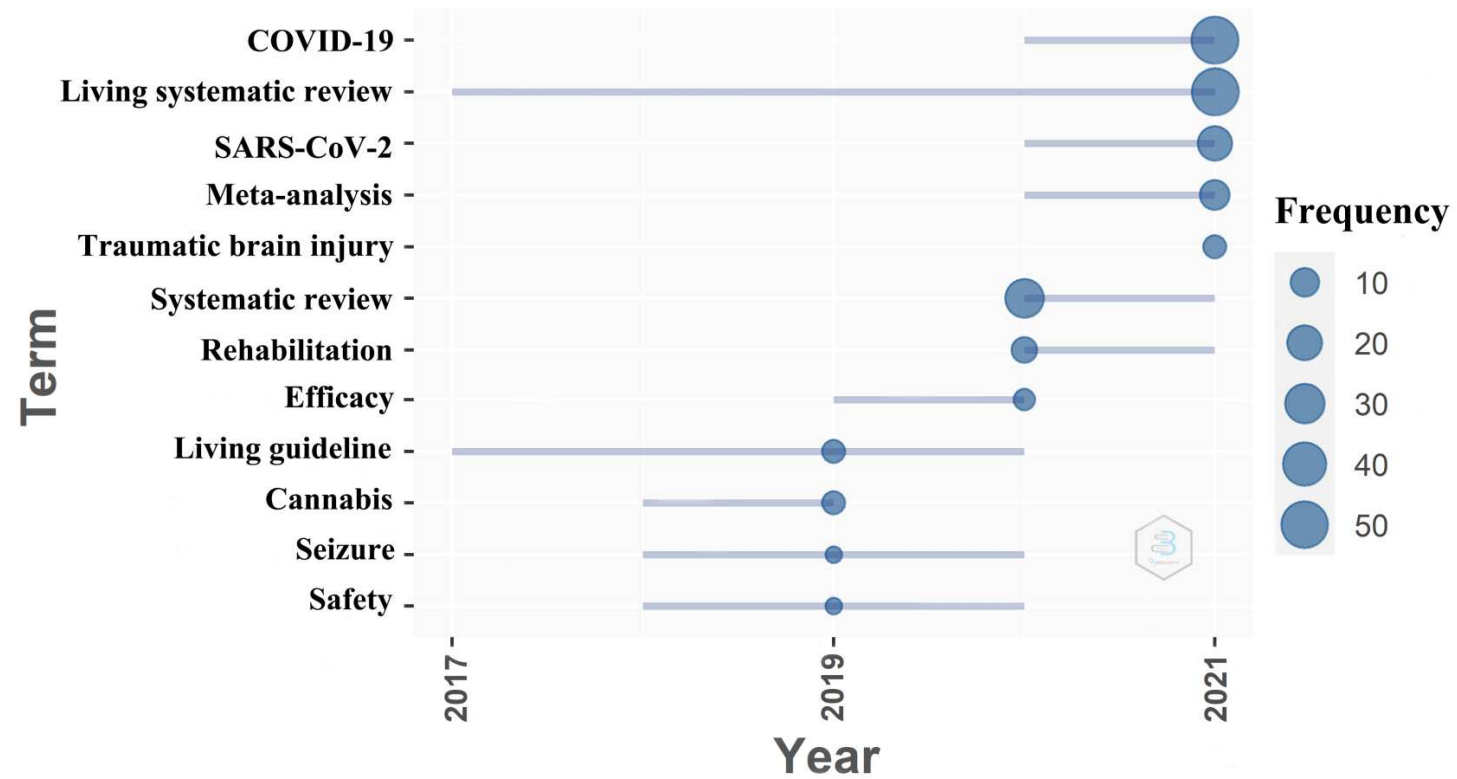

**Supplemental figure 6** Annual hotspot outbreak trajectory trend.
